# Supplementary material
Source: MDPI journal article supplement (https://www.mdpi.com/2311-7524/10/5/480)
Supplement: s1 [file s1]

# Wood Distillate Mitigates Ozone-Induced Visible and Photosynthetic Plant Damage: Evidence from Ozone-Sensitive Tobacco (*Nicotiana tabacum* L.) BelW3

Andrea Vannini \* and Alessandro Petraglia

Department of Chemistry, Life Sciences and Environmental Sustainability, University of Parma,  
Parco Area delle Scienze 11/A, 43124 Parma, Italy; alessandro.petraglia@unipr.it

\* Correspondence: andrea.vannini@unipr.it

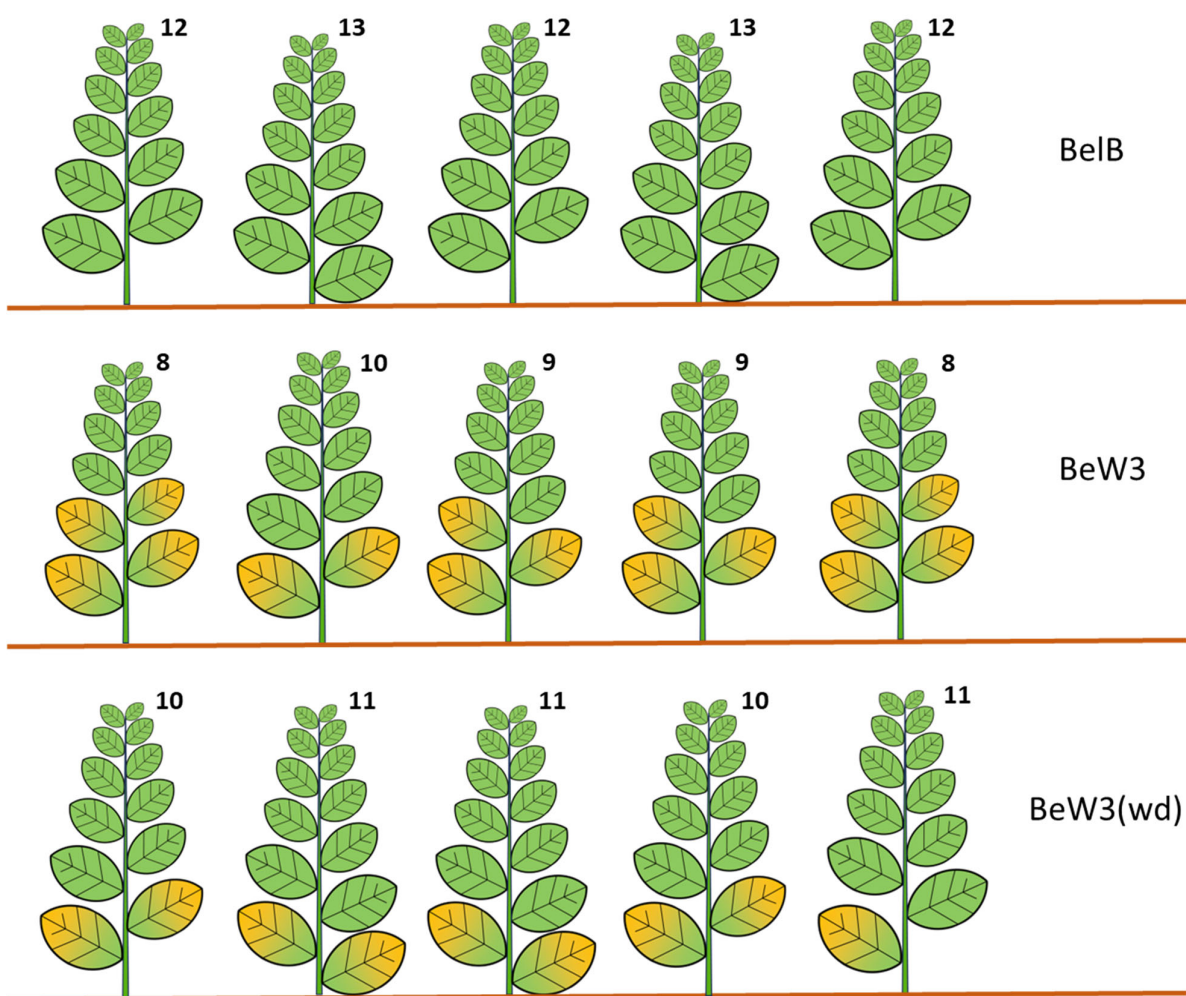

**Figure S1.** Example of the choice of leaf on which to measure photosynthesis. All plants have a leaf number (viable and non-viable: those with more than 50% leaf damage) of 11 to 12. BelW3 plants show a vital leaf number of eight to nine. The choice of leaf therefore falls to number eight, as this is the leaf that is vital in all cultivated plants.
